# Supplementary material for: Upgrading of furfural to biofuel precursors via aldol condensation with acetone over magnesium hydroxide fluorides MgF2−x(OH)x
Source: Royal Society of Chemistry journal article supplement (doi:10.1039/c9cy01259a), 2019-01-01

## Upgrading of furfural to biofuel precursors via aldol condensation with acetone over magnesium hydroxide fluorides $\text{MgF}_{2-x}(\text{OH})_x$

Minrui Xu<sup>1</sup>, Stéphane Célerier<sup>1,\*</sup>, Jean-Dominique Comparot<sup>1</sup>, Julie Rousseau<sup>1</sup>, Matthieu Corbet<sup>2</sup>, Frédéric Richard<sup>1,\*</sup>, Jean-Marc Clacens<sup>1</sup>

<sup>1</sup> Institut de Chimie des Milieux et Matériaux de Poitiers, UMR 7285 Université de Poitiers - CNRS, 4 rue Michel Brunet, BP633, 86022 Poitiers Cedex, France.

<sup>2</sup> Solvay Research & Innovation center of Lyon, 85 rue des Frères Perret BP 62, 69192 Saint Fons, France.

Corresponding authors: [stephane.celerier@univ-poitiers.fr](mailto:stephane.celerier@univ-poitiers.fr) and [frederic.richard@univ-poitiers.fr](mailto:frederic.richard@univ-poitiers.fr);

### Supporting Information

Fig. S1: Nitrogen adsorption–desorption isotherms of magnesium hydroxide fluorides

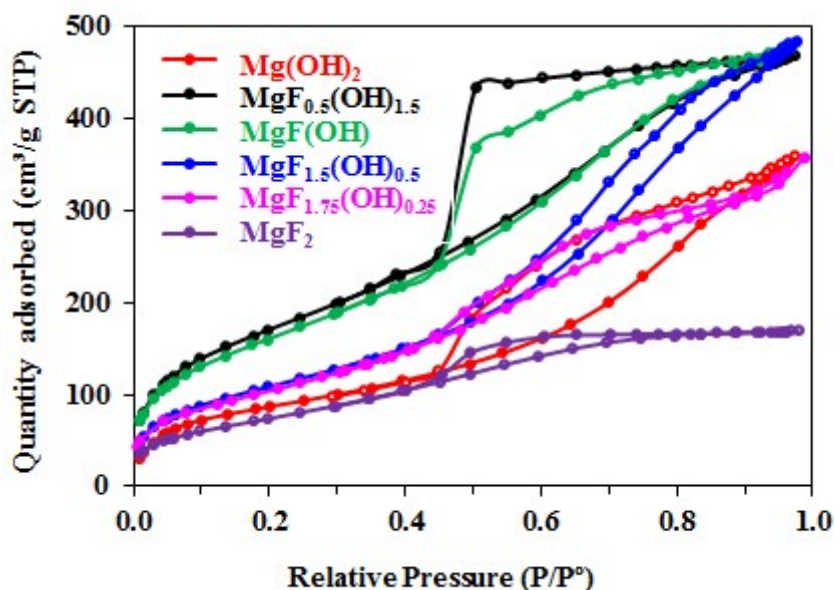

Fig. S2

Aldol condensation of furfural and acetone over  $\text{MgF}_{1.5}(\text{OH})_{0.5}$  at 50 °C under atmospheric pressure (furfural/acetone ratio equal to 0.5). Effect on the reaction time on the conversion of furfural ( $\text{⌘}$ ) and the yield in FAc-OH ( $\text{■}$ ), FAc ( $\text{◆}$ ) and  $\text{F}_2\text{Ac}$  ( $\text{□}$ ).

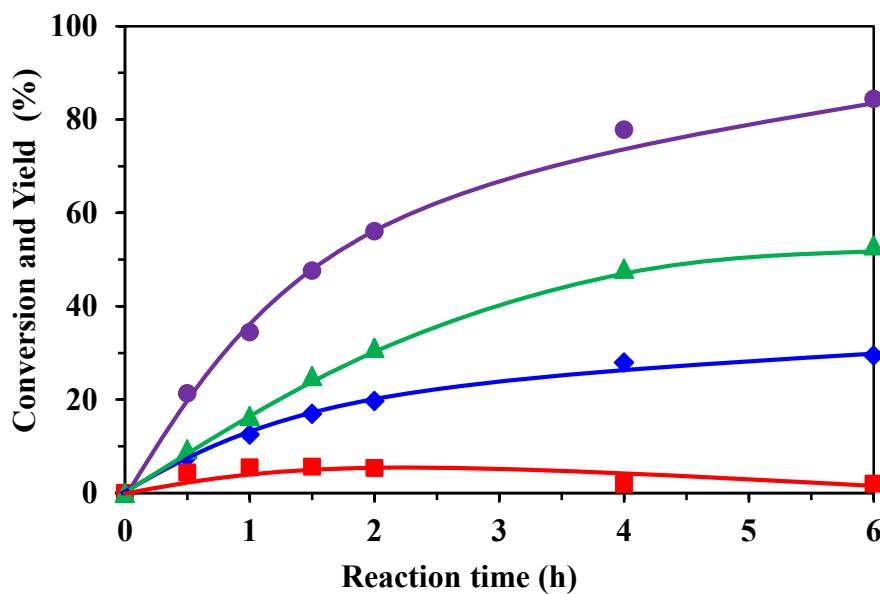

Fig. S3

Aldol condensation of furfural and acetone over  $\text{MgF}_{1.5}(\text{OH})_{0.5}$  at 50 °C under atmospheric pressure. Effect of the reaction time on the furfural consumption at several furfural/acetone (Furf/Ac) ratio. (◆) Furf/Ac = 0.5; (■) Furf/Ac = 1 and (▲) Furf/Ac = 2.

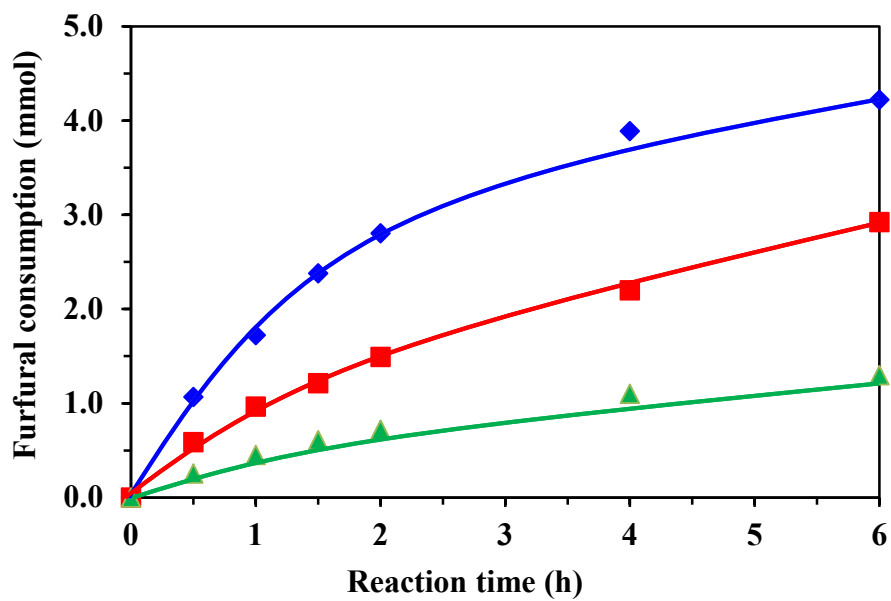

Supplement: c9cy01259a1.pdf [file c9cy01259a1.pdf]
